# Supplementary material for: Assessing the Impact of Lean Healthcare on Inpatient Care: A Systematic Review
Source: Int J Environ Res Public Health. 2020 Aug 4;17(15):5609. doi: 10.3390/ijerph17155609 (PMC7432925; doi:10.3390/ijerph17155609)
Supplement: Supplementary file 1 [file ijerph-17-05609-s001.pdf]

**Table 1.** PRISMA Checklist.

| Section/topic                      | #  | Checklist item                                                                                                                                                                                                                                                                                              | Reported on section |
|------------------------------------|----|-------------------------------------------------------------------------------------------------------------------------------------------------------------------------------------------------------------------------------------------------------------------------------------------------------------|---------------------|
| <b>TITLE</b>                       |    |                                                                                                                                                                                                                                                                                                             |                     |
| Title                              | 1  | Identify the report as a systematic review, meta-analysis, or both.                                                                                                                                                                                                                                         | Title               |
| <b>ABSTRACT</b>                    |    |                                                                                                                                                                                                                                                                                                             |                     |
| Structured summary                 | 2  | Provide a structured summary including, as applicable: background; objectives; data sources; study eligibility criteria, participants, and interventions; study appraisal and synthesis methods; results; limitations; conclusions and implications of key findings; systematic review registration number. | Abstract            |
| <b>INTRODUCTION</b>                |    |                                                                                                                                                                                                                                                                                                             |                     |
| Rationale                          | 3  | Describe the rationale for the review in the context of what is already known.                                                                                                                                                                                                                              | Introduction        |
| Objectives                         | 4  | Provide an explicit statement of questions being addressed with reference to participants, interventions, comparisons, outcomes, and study design (PICOS).                                                                                                                                                  | Introduction        |
| <b>METHODS</b>                     |    |                                                                                                                                                                                                                                                                                                             |                     |
| Protocol and registration          | 5  | Indicate if a review protocol exists, if and where it can be accessed (e.g., Web address), and, if available, provide registration information including registration number.                                                                                                                               | Methods             |
| Eligibility criteria               | 6  | Specify study characteristics (e.g., PICOS, length of follow-up) and report characteristics (e.g., years considered, language, publication status) used as criteria for eligibility, giving rationale.                                                                                                      | Methods             |
| Information sources                | 7  | Describe all information sources (e.g., databases with dates of coverage, contact with study authors to identify additional studies) in the search and date last searched.                                                                                                                                  | Methods             |
| Search                             | 8  | Present full electronic search strategy for at least one database, including any limits used, such that it could be repeated.                                                                                                                                                                               | Data S1             |
| Study selection                    | 9  | State the process for selecting studies (i.e., screening, eligibility, included in systematic review, and, if applicable, included in the meta-analysis).                                                                                                                                                   | Methods             |
| Data collection process            | 10 | Describe method of data extraction from reports (e.g., piloted forms, independently, in duplicate) and any processes for obtaining and confirming data from investigators.                                                                                                                                  | Methods             |
| Data items                         | 11 | List and define all variables for which data were sought (e.g., PICOS, funding sources) and any assumptions and simplifications made.                                                                                                                                                                       | Methods             |
| Risk of bias in individual studies | 12 | Describe methods used for assessing risk of bias of individual studies (including specification of whether this was done at the study or outcome level), and how this information is to be used in any data synthesis.                                                                                      | Methods             |

| Summary measures              | 13 | State the principal summary measures (e.g., risk ratio, difference in means).                                                                                                                            | Methods              |
|-------------------------------|----|----------------------------------------------------------------------------------------------------------------------------------------------------------------------------------------------------------|----------------------|
| Synthesis of results          | 14 | Describe the methods of handling data and combining results of studies, if done, including measures of consistency (e.g., $I^2$ ) for each meta-analysis.                                                | N/A                  |
| Section/topic                 | #  | Checklist item                                                                                                                                                                                           | Reported on page #   |
| Risk of bias across studies   | 15 | Specify any assessment of risk of bias that may affect the cumulative evidence (e.g., publication bias, selective reporting within studies).                                                             | N/A                  |
| Additional analyses           | 16 | Describe methods of additional analyses (e.g., sensitivity or subgroup analyses, meta-regression), if done, indicating which were pre-specified.                                                         | N/A                  |
| <b>RESULTS</b>                |    |                                                                                                                                                                                                          |                      |
| Study selection               | 17 | Give numbers of studies screened, assessed for eligibility, and included in the review, with reasons for exclusions at each stage, ideally with a flow diagram.                                          | Results and Figure 1 |
| Study characteristics         | 18 | For each study, present characteristics for which data were extracted (e.g., study size, PICOS, follow-up period) and provide the citations.                                                             | Table 2 and Table S4 |
| Risk of bias within studies   | 19 | Present data on risk of bias of each study and, if available, any outcome level assessment (see item 12).                                                                                                | Table S5             |
| Results of individual studies | 20 | For all outcomes considered (benefits or harms), present, for each study: (a) simple summary data for each intervention group (b) effect estimates and confidence intervals, ideally with a forest plot. | Table 2 and Table S4 |
| Synthesis of results          | 21 | Present results of each meta-analysis done, including confidence intervals and measures of consistency.                                                                                                  | N/A                  |
| Risk of bias across studies   | 22 | Present results of any assessment of risk of bias across studies (see Item 15).                                                                                                                          | N/A                  |
| Additional analysis           | 23 | Give results of additional analyses, if done (e.g., sensitivity or subgroup analyses, meta-regression [see Item 16]).                                                                                    | N/A                  |
| <b>DISCUSSION</b>             |    |                                                                                                                                                                                                          |                      |
| Summary of evidence           | 24 | Summarize the main findings including the strength of evidence for each main outcome; consider their relevance to key groups (e.g., healthcare providers, users, and policy makers).                     | Results              |
| Limitations                   | 25 | Discuss limitations at study and outcome level (e.g., risk of bias), and at review-level (e.g., incomplete retrieval of identified research, reporting bias).                                            | Discussion           |
| Conclusions                   | 26 | Provide a general interpretation of the results in the context of other evidence, and implications for future research.                                                                                  | Conclusions          |

| FUNDING |    |                                                                                                                                            |     |
|---------|----|--------------------------------------------------------------------------------------------------------------------------------------------|-----|
| Funding | 27 | Describe sources of funding for the systematic review and other support (e.g., supply of data); role of funders for the systematic review. | N/A |

### Data S1. Search Strategy

#### Pubmed-Medline

##### *Healthcare units and inpatient care*

1. ("Hospital Departments/methods"[Mesh] OR "Hospital Departments/organization and administration"[tiab] OR "Hospital Departments/standards"[tiab] OR "Hospital Departments/statistics and numerical data"[tiab] AND lean healthcare).
2. Lean healthcare AND (admitting OR clinic? OR emergency department? OR emergency medicine OR emergency room? OR emergency service? OR family practice? OR general practice? OR healthcare OR hospital? OR inpatient? OR intensive care OR ICU OR oncology OR outpatient? OR pharmacist? OR readmission? OR trauma center? OR trauma service? OR trauma care OR inpatient care OR primary care OR secondary care OR tertiary care).

##### *Lean*

1. ("Lean healthcare"[tiab] OR "lean thinking"[ tiab] OR "lean manufacturing"[ tiab] OR (lean[tiab] AND sigma[tiab]) OR toyota[tiab] OR "lean principles"[ tiab] OR "lean management"[tiab] OR lean process[tiab] OR lean process management[tiab] OR lean healthcare approach[tiab]).
2. Lean healthcare AND (approach OR business model? OR care OR collaborate\* OR design\* OR healthcare OR implementation? OR industry OR initiative? OR intervention\* OR leader\* OR management OR methodology\* OR method? OR organi?ation\* OR planning OR philosophy OR practice\* OR principle\* OR process improvement? OR production OR program? OR quality OR redesign\* OR reengineer\* OR restructure\* OR reorgani\* OR safety OR sigma OR strategy OR thinking OR tool).

##### *Inpatient care outcomes*

1. (((("Length of Stay/organization and administration"[Mesh] OR "Length of Stay/standards"[Mesh] OR "Length of Stay/statistics and numerical data"[Mesh])) OR "Patient Outcome Assessment/organization and administration"[Mesh]) AND ("Total Quality Management/methods"[Mesh] OR "Total Quality Management/organization and administration"[Mesh] OR "Total Quality Management/statistics and numerical data"[Mesh])).

*TAT, TOT, Boarding Time, Discharge, Readmission and On-time starts outcomes*

1. (((((((Turnover time) OR Turnaround time) OR Boarding time) OR discharge order) OR readmission) OR on time starts) AND Lean healthcare) NOT specimens) NOT samples) AND six sigma) AND lean.

## **The Cochrane Library**

### *Healthcare units and inpatient care*

1. Lean healthcare AND (admitting OR clinic? OR emergency department? OR emergency medicine OR emergency room? OR emergency service? OR family practice? OR general practice? OR healthcare OR hospital? OR inpatient? OR intensive care OR ICU OR oncology OR outpatient? OR pharmacist? OR readmission? OR trauma center? OR trauma service? OR trauma care OR inpatient care OR primary care OR secondary care OR tertiary care).

### *Lean*

1. Lean healthcare AND (approach OR business model? OR care OR collaborate\* OR design\* OR healthcare OR implementation? OR industry OR initiative? OR intervention\* OR leader\* OR management OR methodology\* OR method? OR organi?ation\* OR planning OR philosophy OR practice\* OR principle\* OR process improvement? OR production OR program? OR quality OR redesign\* OR reengineer\* OR restructure\* OR reorgani\* OR safety OR sigma OR strategy OR thinking OR tool).

### *Inpatient care outcomes*

1. (Lean and waste). ti,ab. OR (lean adj3 waste). ti,ab.
2. ((Wait\$ time? OR reduc\$ wait\$) and lean). ti,ab. OR ((wait\$ time? OR reduc\$ wait\$) adj4 lean). ti,ab.
3. (Lean and (overcrowd\$ OR patient\$ flow? OR wait time?)). ti,ab.

### *TAT, TOT, Boarding Time, Discharge, Readmission and On-time starts outcomes*

1. (Turnover time OR Turnaround time OR Boarding time OR discharge order OR readmission OR on time starts) AND (Lean healthcare OR six sigma OR Lean).

## **EBSCO**

### *Healthcare units and inpatient care*

1. ("Hospital Departments/methods"[Mesh] OR "Lean Hospital Departments/organization and administration"[tiab] OR "Lean Hospital Departments/standards"[tiab] OR "Lean Hospital Departments/statistics and numerical data"[tiab] AND lean healthcare).

### *Lean*

1. (Lean healthcare[tiab] OR lean thinking[tiab] OR lean process[tiab] OR lean process management[tiab] OR lean healthcare approach[tiab] OR continuous quality management OR lean six sigma[tiab] OR lean management[tiab] OR lean operations management[tiab] OR total quality management [mesh] AND lean healthcare).

### *Inpatient care outcomes*

1. Lean healthcare AND (Patient flow OR waiting time OR length of stay).

*TAT, TOT, Boarding Time, Discharge, Readmission and On-time starts outcomes*

1. (Turnover time OR Turnaround time OR Boarding time OR discharge order OR readmission OR on time starts) AND (Lean healthcare OR six sigma OR Lean).

## **CINAHL**

1. *Healthcare units and inpatient care*
2. Lean healthcare AND (surgical OR surgery OR readmission? OR intensive care OR inpatient? OR ICU OR hospitali#ed OR general practice? OR admitting OR clinics OR emergency department? OR emergency room? OR emergency service? OR family practice? OR primary care OR pharmacy OR hospital? OR oncology OR trauma center? OR trauma service?).

*Lean*

1. Lean healthcare AND (implementation? OR healthcare OR industry OR initiative? OR intervention\* OR leader\* OR management OR method? OR methodolog\* OR planning OR tools OR workshop\* thinking OR strategies OR sigma OR quality OR production OR process improvement? OR principles OR principle OR practices OR practice OR philosophy).

*Inpatient care outcomes*

1. (TI ((wait\* time? OR reduc\* wait\*) and lean) OR AB (lean (overcrowd\* OR patient\* flow?))) OR ((wait\* time? OR reduc\* wait\*) lean)) OR (TI (lean and (overcrowd\* OR patient\* flow?)).

*TAT, TOT, Boarding Time, Discharge, Readmission and On-time starts outcomes*

1. (Turnover time OR Turnaround time OR Boarding time OR discharge order OR readmission OR on time starts) AND (Lean healthcare OR six sigma OR Lean).

## **Web of science**

*Healthcare Units and inpatient care*

1. Lean healthcare AND (healthcare units OR intensive care unit OR clinical management OR health facilities health center OR patient centered care OR patient and family centered care OR public healthcare management).

*Lean*

1. Lean healthcare AND (management OR six sigma OR thinking OR process OR management OR operations OR lean process management OR lean healthcare approach OR lean six sigma OR total quality management).

*Inpatient care outcomes*

1. Lean healthcare AND (length of stay OR wait time OR length in hospital OR patient satisfaction OR wait times and length of hospitalization OR patient flow length of stay prediction OR length of stay cost OR hospital stays OR stay length OR decrease hospital length of stay OR wait and time OR delay time AND lean healthcare).

*TAT, TOT, Boarding Time, Discharge, Readmission and On-time starts outcomes*

1. (Turnover time OR Turnaround time OR Boarding time OR discharge order OR readmission OR on time starts) AND (Lean healthcare OR six sigma OR Lean)

## **Scopus**

*Healthcare Units and Inpatient care*

1. Healthcare units OR intensive care unit OR clinical management OR health facilities health center OR patient centered care OR patient and family centered care OR public healthcare management.

*Lean*

1. (Lean management OR lean six sigma OR lean thinking OR lean process OR lean principles OR lean operations and total quality management OR continuous quality improvement and lean methodology OR lean process management OR lean implementation).

*Inpatient care outcomes*

1. Lean healthcare AND (Patient flow OR waiting time OR length of stay).

*TAT, TOT, Boarding Time, Discharge, Readmission and On-time starts outcomes*

1. (Turnover time OR Turnaround time OR Boarding time OR discharge order OR readmission OR on time starts) AND (Lean healthcare OR six sigma OR Lean).

**Table S2.** Geographical distribution of studies selected.

| <b>Country</b> | <b>Total</b> |
|----------------|--------------|
| USA            | 27           |
| Taiwan         | 1            |
| Spain          | 2            |
| Netherlands    | 2            |
| UK             | 2            |
| Saudi Arabia   | 1            |
| Italy          | 1            |
| India          | 2            |
| Lebanon        | 1            |

**Table S3.** Distribution per year of studies selected

| <b>Year</b> | <b>Total</b> |
|-------------|--------------|
| 2011        | 5            |
| 2016        | 5            |
| 2013        | 4            |
| 2014        | 4            |
| 2017        | 4            |
| 2018        | 4            |
| 2019        | 4            |
| 2015        | 3            |
| 2009        | 2            |
| 2004        | 1            |
| 2007        | 1            |
| 2010        | 1            |
| 2012        | 1            |

**Table 4.** Summary of Findings of Lean Healthcare Intervention.

| First Author, Year, Country  | Aim of Study                                                                                          | Setting, Study Design, (n), Time Frame               | Main Intervention  | Outcomes                                                                                                                                 | Summary of findings                                                                                                                                   |
|------------------------------|-------------------------------------------------------------------------------------------------------|------------------------------------------------------|--------------------|------------------------------------------------------------------------------------------------------------------------------------------|-------------------------------------------------------------------------------------------------------------------------------------------------------|
| Iannettoni , 2011, USA [1]   | To improve patient outcomes, increasing patient satisfaction, and creating efficiencies in the system | Cardiothoracic, Pre-Post, (n=64), 60 months          | Lean and Kaizen    | Cost per case<br>Length of stay (Average)<br>CEGA leak (Rate)<br>Savings<br>Operative time                                               | Cost reduction of 43%<br>Decreased from 14 to 5 days<br>Decreased from 12% to zero leaks<br>Daily savings of \$4,500<br>Decreased from 348 to 189 min |
| Hseng-Long, 2011, Taiwan [2] | To improve the medical process of acute myocardial infarction                                         | Cardiology, Pre-Post, (n=46), 15 months              | Lean and Six Sigma | Wait time to see a doctor (Mean)<br>Process cycle efficiency<br>Length of stay (Average)<br>Saving in medical resource                   | Decreased from 139.2 to 57.9 min<br>Increased from 32.2 to 51.8%<br>Decreased by 3 days<br>Estimated savings of NT \$4.422 million                    |
| Gayed, 2013, USA [3]         | To determine the effectiveness of Lean Six Sigma process improvement methods                          | Department of Surgery, Pre-Post, (n=540), 35 months  | Lean Six Sigma     | Length of stay (Mean)<br>Return on investment                                                                                            | Decreased from 5.3 to 3.4 days (p<0.001)<br>Estimates of \$1 million return annually                                                                  |
| De la Lama, 2013, Spain [4]  | To improve internal processes in a hospital center through three pilot projects                       | Rehabilitation ward, Pre-Post, (n=75,490), 15 months | Six Sigma          | Delay in outpatients (Mean)<br>Absenteeism (Percentage)<br>Length of stay (Mean)                                                         | Decreased from 523.5 to 125.2 min (p<0.001)<br>Decreased from 11.4 to 6.2% (NSS)<br>Decreased from 164.1 to 58.2 days (p<0.001)                       |
| Beck, 2016, USA [5]          | To improve emergency department throughput and reduced emergency department boarding                  | Emergency department, Pre-Post, (n=6,906), 25 months | Lean               | Discharge order entry time (Median)<br>Discharge time (Median)<br>Patients discharged before noon (Percent)<br>ED boarding time (Median) | Decreased from 1:43 pm to 11:28 am (p<0.0001)<br>Decreased from 3:25 to 2:25 pm (p<0.0001)<br>Increased from 14 to 26% (p<0.0001)                     |

|                                   |                                                                                                                    |                                                                    |                               |                                                                                                                                    |                                                                                                                                                                              |
|-----------------------------------|--------------------------------------------------------------------------------------------------------------------|--------------------------------------------------------------------|-------------------------------|------------------------------------------------------------------------------------------------------------------------------------|------------------------------------------------------------------------------------------------------------------------------------------------------------------------------|
|                                   |                                                                                                                    |                                                                    |                               | Length of stay (Average)                                                                                                           | Decreased from 176 to 127 min<br>(p<0.0001)<br>Decreased from 3.8 to 3.4 days                                                                                                |
| Castaldi,<br>2016, USA<br>[6]     | To increase efficiency in<br>the entire peri-operative<br>process and increase<br>operating room<br>utilization    | Operating room,<br>Pre-Post, 32 months                             | Lean and RIE                  | OR turnover time (Average)<br>On-time Starts (Percentage)<br>OR utilization (Percentage)<br>Cancellations on the day of<br>surgery | Decreased from 54 to 41 min<br>(p=0.0001)<br>Increased from 54 to 84% (p=0.0001)<br>Increased from 65.5 to 80% (p=0.0007)<br>No statistically significant change<br>(p=0.69) |
| Trzeciak,<br>2018, USA<br>[7]     | To reduce hospital LOS<br>and associated costs of<br>care for patients with<br>prolonged mechanical<br>ventilation | Intensive care unit,<br>Cohort study, (n=269),<br>24 months        | Lean Six<br>Sigma             | Length of stay (Median)<br>Hospital direct cost per case<br>(Median)                                                               | Decreased from 29 to 22 days<br>(p<0.001)<br>Decreased from \$66,335 to \$48,370<br>(p<0.001)                                                                                |
| Burkitt,<br>2009, USA<br>[8]      | To reduce nosocomial<br>MRSA infections on<br>surgical unit and length<br>of stay                                  | Department of Surgery,<br>Cohort study, (n=1,779),<br>48 months    | TPS                           | Appropriate perioperative<br>(Proportion)<br>Length of stay (Median)                                                               | Increased from 23.4 to 44% (p<0.01)<br>No statistically significant change<br>(p=0.90)                                                                                       |
| New,<br>2016, UK<br>[9]           | To examine the<br>effectiveness of a<br>“systems” approach using<br>Lean methodology to<br>improve surgical care   | Orthopedic trauma<br>theatre,<br>Pre-Post, (n=1,041), 18<br>months | Lean                          | Length of stay (Mean)<br>90 Days Readmissions<br>(Proportion)                                                                      | No statistically significant change<br>(p=0.396)<br>No statistically significant change<br>(p=0.30)                                                                          |
| Collar,<br>2012, USA<br>[10]      | To improve efficiency and<br>profitability and<br>preserves team morale<br>and educational<br>opportunities        | Operating room,<br>Cohort study, (n=199),<br>18 months             | Lean                          | Turnover time (Mean)<br>Turnaround time (Mean)<br>Employee satisfaction<br>Annual Opportunity revenue                              | Decreased from 38.4 to 29 min<br>(p<0.001)<br>Decreased from 89.5 to 69.3 min<br>(p<0.001)<br>Increased from 2.9 to 3.6 (p=0.011)<br>Annual revenue of \$330,000             |
| Artenstei<br>n, 2017,<br>USA [11] | To optimize patient<br>progress for adult<br>patients                                                              | Emergency Department,<br>Pre-Post, 24 months                       | Lean Six<br>Sigma and<br>BPPI | Length of stay (Mean)<br>ED boarding time (Mean)<br>ED walkout per day (Rate)                                                      | Decreased from 5.3 to 5 days<br>(p<0.005)<br>Decreased from 7.6 to 5.5 h (p=0.007)                                                                                           |

|                                     |                                                                                                   |                                                        |                |                                              |                                               |
|-------------------------------------|---------------------------------------------------------------------------------------------------|--------------------------------------------------------|----------------|----------------------------------------------|-----------------------------------------------|
|                                     |                                                                                                   |                                                        |                | Discharge orders before noon (Percentage)    | Decreased from 31 to 21 patients (p=0.01)     |
|                                     |                                                                                                   |                                                        |                | Patients seen on daily IPOC rounds (Percent) | Increased from 43 to 54.1% (p < 0.001)        |
|                                     |                                                                                                   |                                                        |                | Inpatient capacity                           | Increased from 44 to 83% (p<0.001)            |
|                                     |                                                                                                   |                                                        |                |                                              | Increased 20 open beds.                       |
| Hassanai n, 2016, Saudi Arabia [12] | To improve the utilization of the operating room                                                  | Operating room, Cohort study, 28 months                | Lean           | On-time start (Percentage)                   | Increased from 14 to 34% (p<0.001)            |
|                                     |                                                                                                   |                                                        |                | OR utilization (Percentage)                  | Increased from 39 to 49% (p<0.001)            |
|                                     |                                                                                                   |                                                        |                | Room turnover time (Median)                  | No statistically significant change           |
|                                     |                                                                                                   |                                                        |                |                                              | Decreased from 11.7 to 6.7% (p=0.034)         |
|                                     |                                                                                                   |                                                        |                | 30-day mortality (Rate)                      | Decreased from 20.7 to 11.4% (p=0.002)        |
|                                     |                                                                                                   |                                                        |                | Overall mortality (Rate)                     | No statistically significant change (p=0.08)  |
|                                     |                                                                                                   |                                                        |                | Door to theatre time (≤24 h) (Percentage)    | No statistically significant change (p=0.481) |
|                                     |                                                                                                   |                                                        |                | Door to theatre time (>48 h) (Percentage)    | No statistically significant change (p=0.421) |
|                                     |                                                                                                   |                                                        |                | Admission to a trauma ward (Percentage)      | No statistically significant change (p=0.178) |
|                                     |                                                                                                   |                                                        |                | Length of stay (Median)                      |                                               |
| Montella, 2017, Italy [14]          | To reduce the number of patients affected by sentinel bacterial infections who are at risk of HAI | Department of Surgery, Pre-Post, (n=22,262), 48 months | Lean Six Sigma | Length of stay (Mean)                        | Decreased from 45 to 36 days (p=0.038)        |
|                                     |                                                                                                   |                                                        |                | Associated infections (Percentage)           | Decreased from 0.3 to 0.2% (p=0.031)          |

|                               |                                                                       |                                                       |                   |                                               |                                                                                                                                           |
|-------------------------------|-----------------------------------------------------------------------|-------------------------------------------------------|-------------------|-----------------------------------------------|-------------------------------------------------------------------------------------------------------------------------------------------|
| Cima,<br>2011, USA<br>[15]    | To improve Operating<br>Room efficiency                               | Operating room,<br>Pre-Post, (n=8,497), 18<br>months  | Lean Six<br>Sigma | On-time starts (Percentage)                   | TS increased from 50 to 80% (p<0.05);<br>GYN increased from 64 to 92%<br>(p<0.05); Gen/CRS increased from 60<br>to 92% (p<0.05)           |
|                               |                                                                       |                                                       |                   | Operations past 5 PM<br>(Percentage)          | TS decreased from 34 to 36%<br>(p=0.34); GYN decreased from 42 to<br>36% (p<0.05); GEN decreased from 37<br>to 31% (p<0.05)               |
|                               |                                                                       |                                                       |                   | Turnover time (Average)                       | TS decreased from 40 to 30 min<br>(p<0.05); GYN decreased from 35 to<br>20 min (p<0.05); Gen/CRS decreased<br>from 34 to 23 min (p<0.05). |
|                               |                                                                       |                                                       |                   | Staff overtime (Average)                      | TS decreased from 109 to 92 min;<br>GYN decreased from 106 to 87 min;<br>GEN decreased from 87 to 41 min                                  |
|                               |                                                                       |                                                       |                   | Daily OR capacity                             | TS increased from 0 to 0.7 ORs per<br>day; GYN increased from 0 to 0.5<br>ORs per day; GEN increased from 0<br>to 0.4 ORs per day.        |
|                               |                                                                       |                                                       |                   | Change in operating margin<br>(Percentage)    | TS increased from 1 to 1.2%; GYN<br>increased from 1 to 1.1%; GEN<br>increased from 1 to 1.5%                                             |
| Singh,<br>2014,<br>India [16] | To increase the efficiency<br>of the operating theater<br>utilization | Operating room,<br>Pre-Post, (n=231), 6<br>months     | Lean Six<br>Sigma | Patient in and Induction begin<br>time (Mean) | Decreased from 5.1 to 3.6 min<br>(p<0.0017)                                                                                               |
|                               |                                                                       |                                                       |                   | Induction End time and Incision<br>(Mean)     | Decreased from 15.6 to 12.5 min<br>(p<0.0574)                                                                                             |
|                               |                                                                       |                                                       |                   | Turnaround time (Mean)                        | Decreased from 17.6 to 10.4 min<br>(p<0.0002)                                                                                             |
| Bender,<br>2015, USA<br>[17]  | To improve operating<br>room utilization                              | Operating room,<br>Pre-Post, (n=25,903), 36<br>months | Lean Six<br>Sigma | Outpatient's readiness on time<br>for surgery | Increased from 59 to 95%                                                                                                                  |
|                               |                                                                       |                                                       |                   |                                               | Increased from 32 to 73%                                                                                                                  |

|                                  |                                                                                                                    |                                                                |                |                                                                                                                                                                                          |                                                                                                                                                                                                                          |
|----------------------------------|--------------------------------------------------------------------------------------------------------------------|----------------------------------------------------------------|----------------|------------------------------------------------------------------------------------------------------------------------------------------------------------------------------------------|--------------------------------------------------------------------------------------------------------------------------------------------------------------------------------------------------------------------------|
|                                  |                                                                                                                    |                                                                |                | First case on-time starts<br>(Percentage)<br>Block utilization<br>Actual room Utilization<br>Overtime<br>Personnel costs<br>Annual Revenues<br>Turnover time (Average)                   | Increase from 68 to 74%<br>Increased from 56 to 68%<br>Increased from 7 to 4%<br>Decreased 14 despite 26% more employees<br>Increased more than 10%<br>No statistically significant change                               |
| Beck,<br>2015, USA<br>[18]       | To determine the impact of Lean Six Sigma on advancing times of placement of discharge order and patient discharge | Inpatient pediatric service,<br>Pre-Post, (n=3,509), 12 months | Lean Six Sigma | Time of patient discharge (Median)<br>Patients discharged by noon (Proportion)<br>Length of stay (Mean)<br>Patient Satisfaction<br>Revenue                                               | Decreased from 15:48 to 14:15 min (p<0.0001)<br>Decreased from 27 to 14% (p<0.0001)<br>No statistically significant change (p=0.864)<br>Increased from 91 to the 94 percentiles<br>Increased from \$275,000 to \$412,000 |
| Tagge,<br>2017, USA<br>[19]      | To improving operating room efficiency                                                                             | Operating room,<br>Pre-Post, (n=612), 6 months                 | Lean Six Sigma | Turnover time (Median)<br>Turnaround time (Median)                                                                                                                                       | Decreased from 41 to 32 min (p<0.0001)<br>Decreased from 81.5 to 71 min (p<0.0001)                                                                                                                                       |
| Toledo,<br>2013, USA<br>[20]     | To decrease the length of stay for liver transplant                                                                | Organ transplant center,<br>Pre-Post, (n=103), 48 months       | Lean Six Sigma | Length of stay after liver transplant (Median)<br>30-day Readmission (Rate)<br>Mortality rates at 30 days and 1 year                                                                     | Decreased from 11 to 8 days (p<0.05)<br>No statistically significant change (p=0.63)<br>No statistically significant change                                                                                              |
| Fairbanks<br>, 2007,<br>USA [21] | To improve patient flow in the perioperative environment                                                           | Operation Room,<br>Pre-Post, 12 months                         | Lean Six Sigma | On-time start (Percentage)<br>Turnaround time (Mean)<br>Wait times before surgical procedures<br>Communication of delays<br>Patient perception of how well staff members worked together | Increased from 12 to 89%<br>Decreased from 23.8 to 17.9 min<br>Increased from 85.7 to 88.1 min<br>Increased from 85.9 to 88.2 min<br>Increased from 95.8 to 97.2 (p=0.05)                                                |

|                                   |                                                                                                      |                                                      |                |                                                                                                                                                                                                                     |                                                                                                                                                                                                                                                                                                                                     |
|-----------------------------------|------------------------------------------------------------------------------------------------------|------------------------------------------------------|----------------|---------------------------------------------------------------------------------------------------------------------------------------------------------------------------------------------------------------------|-------------------------------------------------------------------------------------------------------------------------------------------------------------------------------------------------------------------------------------------------------------------------------------------------------------------------------------|
| Molla, 2018, USA [22]             | To decrease emergency department throughput time                                                     | Operating room, Pre-Post, (n=1,471), 28 months       | Lean Six Sigma | Discharge orders released by 10:00 (Percentage)<br>Patients discharged by noon (Percentage)<br>30-day readmission (Rate)<br>Length of stay (Mean)                                                                   | Increased by 21.3% (p<0.001)<br><br>Increased by 7.5% (p=0.001)<br>No statistically significant change (p=0.492)<br>No statistically significant change (p=0.153)                                                                                                                                                                   |
| Niemeijer, 2010, Netherlands [23] | To reduce the mean LOS to create more admission capacity and reduce costs                            | Trauma Care, Pre-Post, (n=1,693), 18 months          | Lean Six Sigma | Length of stay of (Average)<br>Savings<br>Bed availability (Average)<br>Readmission rate                                                                                                                            | Decreased from 11.8 to 8.5 days<br>Financial benefit of €176,400<br>Increased from 2 to 4.4 beds<br>No change                                                                                                                                                                                                                       |
| Sayeed, 2018, USA [24]            | To illustrate the application of LSS in the implementation of a hip fracture integrated care pathway | Operating room, Pre-Post, (n=505), 24 months         | Lean Six Sigma | Time to surgery (Mean)<br>Patients operated (Percentage)<br>Length of stay (Average)<br>Hospital cost per case<br>30-day readmissions (Rate)<br>Duration of surgery<br>Complication detection<br>Transfusion (Rate) | Decreased from 26.1 to 22.7 h (p=0.06)<br>Decreased from 9.5% to 4.2% (p=0.01)<br>Decreased from 6.0 to 5.2 days (p=0.02)<br>Decreased by 9.7% (p=0.016)<br>No statistically significant change (p=0.13)<br>Decreased from 1.1 to 1.0 h (p=0.03)<br>Increased from 62.4 to 80.1% (p<0.001)<br>Decreased from 58.3 to 50.5% (p=0.07) |
| Brunsmann, 2018, USA [25]         | To optimize timely administration of Centers for Medicare and Medicaid Services                      | Inpatient pharmacy, Cohort study, (n=102), 15 months | Lean           | Turnaround time from CMS (Median)<br>Time from order to medication (Median)<br>Savings<br>Time from verification to medication (Median)<br>Length of stay (Median)                                                  | Decreased from 120 to 80 min (p=0.014)<br>Increased from 5.5 to 10.5 min (p=0.11)<br>Estimated savings of \$250,000<br>Decreased from 116 to 66 min (p=0.005)                                                                                                                                                                       |

|                                              |                                                                                                    |                                                             |                   |                                                                                                                                                                                   |                                                                                                                                                                                                                                        |
|----------------------------------------------|----------------------------------------------------------------------------------------------------|-------------------------------------------------------------|-------------------|-----------------------------------------------------------------------------------------------------------------------------------------------------------------------------------|----------------------------------------------------------------------------------------------------------------------------------------------------------------------------------------------------------------------------------------|
|                                              |                                                                                                    |                                                             |                   |                                                                                                                                                                                   | Decreased from 22.9 to 13.2 days<br>(p=0.049)                                                                                                                                                                                          |
| Johnson,<br>2016, USA<br>[26]                | To investigate the impact<br>on 30-day all-cause<br>readmissions among<br>heart failure patients   | Emergency department,<br>Pre-Post, (n=1,394), 24<br>months  | Lean Six<br>Sigma | Heart failure patient's<br>readmission (Average)<br>Length of stay (Mean)<br>Service Savings                                                                                      | Decreased from 28.4 to 18.9%<br>(p<0.01)<br><br>No statistically significant change<br>(p=0.70)<br>Estimated savings of \$1,056 per<br>patient per year                                                                                |
| Sirvent,<br>2016,<br>Spain<br>[27]           | To improve the flow of<br>critically ill patients in the<br>intensive care unit<br>hospital        | Intensive care unit,<br>Pre- Post, (n=1,388), 12<br>months  | Lean              | ICU boarding time (Mean)<br>Personal satisfaction (Mean)<br>Length of stay (Mean)<br>Readmissions to ICU<br>(Percentage)<br>Emergency transfer due to lack<br>of beds             | Decreased from 360.8 to 276.7 min<br>(p=0.036)<br>Increased from 6.6 to 7.5 (p=0.001)<br>No statistically significant change<br>(p=0.992)<br>No statistically significant change<br>(p=0.966)<br>Decreased from 45 to 14.3% (p=0.045)  |
| Vose,<br>2014, USA<br>[28]                   | To address emergency<br>department overcrowding                                                    | Emergency department,<br>Pre-Post, 24 months                | Lean              | Pull time (boarding time<br>average)<br>Overall patient satisfaction<br>Capacity                                                                                                  | Decreased from 58.9 to 43.6 min<br>Increased from 60-80 to 90<br>Increased 14 bed h per day                                                                                                                                            |
| Niemeijer<br>, 2013,<br>Netherlan<br>ds [29] | To improve efficiency of<br>care and reducing the<br>LOS                                           | Department of Surgery,<br>Pre-Post, (n= 332), 45<br>months  | Lean Six<br>Sigma | Length of stay (Average)<br>Duration of surgery (Average)<br>Cost saving                                                                                                          | Decreased from 13.5 to 9.3 days<br>(p=0.000)<br>Decreased from 154 to 98 min.<br>(p=0.000)<br>Estimated savings of €120,000                                                                                                            |
| Sorensen,<br>2019, USA<br>[30]               | To develop a Lean quality<br>improvement<br>intervention for knee and<br>hip arthroplasty patients | Department of Surgery,<br>Pre-Post, (n=4,253), 36<br>months | Lean              | Length of stay (Mean)<br>30-day readmission (Percentage)<br>Discharge to home (vs<br>rehabilitation facility or skilled<br>nursing facility) (Percentage)<br>Patient satisfaction | Decreased from 3.2 to 2.4 (p<0.001)<br>Decreased from 3.1 to 1.1% (p=0.032)<br>Increased from 72 to 91% (p<0.001)<br>for hip patients; Increased from 70%<br>to 87% (p<0.001) for knee patients<br>Increased from 4.7 to 4.9 (p=0.013) |

|                           |                                                                                                                          |                                                          |                |                                                                                                                                                                                                 |                                                                                                                                                                    |
|---------------------------|--------------------------------------------------------------------------------------------------------------------------|----------------------------------------------------------|----------------|-------------------------------------------------------------------------------------------------------------------------------------------------------------------------------------------------|--------------------------------------------------------------------------------------------------------------------------------------------------------------------|
| Moo-Young, 2019, USA [31] | To increase the percentage of patients discharged                                                                        | Pediatric gastroenterology, Pre-Post, (n=355), 12 months | Lean Six Sigma | 30-day readmission (rate)<br>Discharged before 1 pm (Percentage)<br>Length of stay (Mean)<br>Potential associated savings                                                                       | No statistically significant change (p=0.54)<br>No statistically significant change<br>Decreased from 5.7 to 4.7 days (p=0.055)<br>Estimated savings of \$373,000  |
| Cerfolio, 2019, USA [32]  | To improve operating room turnover time                                                                                  | Operating room, Pre-Post, (n=128), 6 months              | Lean           | Operating room turnover (Median)<br>Return of investment                                                                                                                                        | Decreased from 37 to 14 min (p<0.0001)<br>Estimated return on investment of \$19,500 per day                                                                       |
| Ankrum, 2019, USA [33]    | To prevent environmental transmission of pathogens                                                                       | Isolation room, Pre-Post, (n=38), 2 months               | Lean           | Room turnover time (Median)<br>Time between room breakdown to cleaning start time (Median)<br>Room cleaning complete to UV disinfection start<br>Duration of room cleaning and curtain changing | Decreased from 130 to 65 min (p<0.0001)<br>Decreased from 10 to 3 min (p=0.004)<br>Decreased from 36 to 8 min (p<0.0001)<br>Decreased from 57 to 37 min (p<0.0001) |
| Peter, 2011, USA [34]     | To identify possible causes for delay in performing operating procedures on time and instituting effective interventions | Operating room, Pre-Post, 24 months                      | Lean Six Sigma | Cases starting on time (Percentage)                                                                                                                                                             | Increased from 13 to 80%                                                                                                                                           |
| Allen, 2009, USA [35]     | To apply a DMAIC approach to a streamline patient discharge process at a community hospital                              | Hospital discharge process, Pre-Post, (n=150), 6 months  | Six Sigma      | Discharge time (Average)<br>Records with specific types of omissions (Percentage)                                                                                                               | Decrease from 3.3 to 2.8 h (p=0.068)<br>Decrease of 79% in missing entries                                                                                         |
| El-Eid, 2015,             | To assess the effectiveness of using Six Sigma                                                                           | Emergency department, Pre-Post, (n=17,054), 10 months    | Six Sigma      | Discharge time (Mean)<br>Patients discharge order before noon (Percentage)                                                                                                                      | Decreased from 2.2 to 1.7 h (p<0.001)<br>No statistical change (p=0.008)                                                                                           |

|                         |                                                                                                                                                       |                                                  |           |                                                                                                                                       |                                                                                                                                 |
|-------------------------|-------------------------------------------------------------------------------------------------------------------------------------------------------|--------------------------------------------------|-----------|---------------------------------------------------------------------------------------------------------------------------------------|---------------------------------------------------------------------------------------------------------------------------------|
| Lebanon<br>[36]         | methods to improve the patient discharge process                                                                                                      |                                                  |           | Patients leaving the room before noon (Percentage)<br>Hospital length of stay (Mean)<br>Length of stay of admitted ED patients (Mean) | Increased from 15.9 to 20.7% (p<0.001)<br><br>Decreased from 3.4 to 3.1 days (p<0.001)<br>Decreased from 6.9 to 5.9 h (p<0.001) |
| Vijay, 2014, India [37] | To reduce the discharge cycle time process at a tertiary care hospital                                                                                | Surgical department, Pre-Post, (n=120), 3 months | Six Sigma | Cycle time of patient discharge process (Average)                                                                                     | Decreased from 234 to 143 min                                                                                                   |
| Deldar, 2017, USA [38]  | To identify etiologies of late surgery, start times, implement lean, and analyze their effects                                                        | Operating room, Pre-Post, (n=4,492), 7 months    | Lean      | On-time starts (Percentage)                                                                                                           | Increased from 57 to 69% (p<0.01)                                                                                               |
| Adams, 2004, USA [39]   | To decrease the mean and SD in turnaround time and to decrease the percentage of cases outside upper specification limits for General Surgery Service | Operating room, Pre-Post, (n=96), 8 months       | Six Sigma | Turnaround time between cases in the operating room (Mean)                                                                            | Decreased from 22.8 to 15.6 min                                                                                                 |

**Note.** OR indicates operating room; RIE, Rapid improvement event; ED, Emergency department; TPS, Toyota Production System; BPPI, Baystate Patient Progress Initiative; h, Hours; TS, Thoracic surgery; GYN, Gynecologic oncology surgery; Gen/CRS, General and colorectal surgery; CEGA, Cervical esophagogastric anastomotic; NSS, No statistical significance; IPOC, Interdisciplinary plan of care; CMS, Centers for Medicare and Medicaid Services; UV, Ultraviolet. Only the last name of the first author and the year of publication are shown.

**Table 5.** Risk of Bias.

| Study             | D1  | D2  | D3  | D4  | D5  | D6  | D7  | Overall |
|-------------------|-----|-----|-----|-----|-----|-----|-----|---------|
| Adams (2004)      | (-) | (X) | (-) | (-) | (+) | (X) | (-) | (-)     |
| Allen (2009)      | (-) | (X) | (-) | (-) | (+) | (+) | (-) | (-)     |
| Ankrum (2019)     | (-) | (X) | (-) | (-) | (+) | (+) | (-) | (-)     |
| Artenstein (2017) | (X) | (X) | (-) | (-) | (X) | (+) | (-) | (X)     |
| Beck (2016)       | (-) | (X) | (-) | (-) | (+) | (+) | (-) | (-)     |
| Beck (2015)       | (-) | (X) | (-) | (-) | (+) | (+) | (-) | (-)     |
| Bender (2015)     | X   | (X) | (-) | (-) | (+) | (-) | (-) | (X)     |
| Brunsmann (2018)  | (-) | (X) | (-) | (-) | (+) | (+) | (-) | (-)     |
| Burkitt (2009)    | (-) | (X) | (-) | (-) | (+) | (+) | (-) | (-)     |
| Castaldi (2016)   | X   | (X) | (-) | (-) | (X) | (+) | (-) | (X)     |
| Cerfolio (2019)   | (-) | (X) | (-) | (-) | (+) | (+) | (-) | (-)     |
| Cima (2011)       | (-) | (X) | (-) | (-) | (+) | (+) | (-) | (-)     |
| Collar (2012)     | (-) | (X) | (-) | (-) | (+) | (+) | (-) | (-)     |
| De la Lama (2013) | (-) | (X) | (-) | (-) | (+) | (+) | (-) | (-)     |
| Deldar (2017)     | (-) | (X) | (-) | (-) | (+) | (+) | (-) | (-)     |
| El-Eid (2015)     | (-) | (X) | (-) | (-) | (+) | (+) | (-) | (-)     |
| Fairbanks (2007)  | (-) | (X) | (-) | (-) | (X) | (-) | (-) | (X)     |
| Gayed (2013)      | (-) | (X) | (-) | (-) | (+) | (+) | (-) | (-)     |
| Hassanain (2016)  | (-) | (X) | (-) | (-) | (X) | (+) | (-) | (-)     |
| Hseng-Long (2011) | (-) | (X) | (-) | (-) | (+) | (-) | (-) | (-)     |
| Iannettoni (2011) | (X) | (X) | (-) | (-) | (+) | (-) | (-) | (X)     |
| Johnson (2016)    | (-) | (X) | (-) | (-) | (+) | (+) | (-) | (-)     |
| Molla (2018)      | (-) | (X) | (-) | (-) | (+) | (+) | (-) | (-)     |
| Montella (2017)   | (X) | (X) | (-) | (-) | (+) | (+) | (-) | (X)     |

|                  |     |     |     |     |     |     |     |     |
|------------------|-----|-----|-----|-----|-----|-----|-----|-----|
| Moo-Young (2019) | (-) | (X) | (-) | (-) | (+) | (+) | (-) | (-) |
| New (2016)       | (-) | (X) | (-) | (-) | (+) | (+) | (-) | (-) |
| Niemeijer (2013) | (-) | (X) | (-) | (-) | (+) | (+) | (-) | (-) |
| Niemeijer (2010) | (X) | (X) | (-) | (-) | (+) | (X) | (-) | (X) |
| Peter (2011)     | (X) | (X) | (-) | (-) | (X) | (X) | (-) | (X) |
| Sayeed (2018)    | (-) | (X) | (-) | (-) | (+) | (+) | (-) | (-) |
| Singh (2014)     | (X) | (X) | (-) | (-) | (+) | (+) | (-) | (X) |
| Sirvent (2016)   | (-) | (X) | (-) | (-) | (+) | (+) | (-) | (-) |
| Sorensen (2019)  | (X) | (X) | (-) | (-) | (+) | (+) | (-) | (X) |
| Tagge (2017)     | (-) | (X) | (-) | (-) | (+) | (+) | (-) | (-) |
| Toledo (2013)    | (-) | (X) | (-) | (-) | (+) | (+) | (-) | (-) |
| Trzeciak (2018)  | (-) | (X) | (-) | (-) | (+) | (+) | (-) | (-) |
| Vijay (2014)     | (X) | (X) | (-) | (-) | (+) | (X) | (-) | (X) |
| Vose (2014)      | (-) | (X) | (-) | (-) | (X) | (-) | (-) | (-) |
| Yousri (2011)    | (-) | (X) | (-) | (-) | (+) | (+) | (-) | (-) |

**Domains:** D1: Bias due to confounding. D2: Bias due to selection of participants. D3: Bias in classification of interventions. D4: Bias due to deviations from intended intervention. D5: Bias due to missing data. D6: Bias in measurement of outcomes. D7: Bias in selection of the reported result. **Judgement:** (X) Serious. (-) Moderate. (+) Low. Only the last name of the first author and the year of publication are shown.

## References

1. Iannettoni, M.D.; Lynch, W.R.; Parekh, K.R.; McLaughlin, K.A. Kaizen method for esophagectomy patients: Improved quality control, outcomes, and decreased costs. *Ann. Thorac. Surg.* **2011**, *91*, 1011–1017, doi:10.1016/j.athoracsur.2011.01.001.
2. Hseng-Long, Y.; Chin-Sen, L.; Chao-Ton, S.; Pa-Chun, W. Applying lean six sigma to improve healthcare: An empirical study. *African J. Bus. Manag.* **2011**, *5*,

- 12356–12370, doi:10.5897/AJBM11.1654.
3. Gayed, B.; Black, S.; Daggy, J.; Munshi, I.A. Redesigning a Joint Replacement Program using Lean Six Sigma in a Veterans Affairs Hospital. *JAMA Surg.* **2013**, *148*, 1050–1056, doi:10.1001/jamasurg.2013.3598.
  4. De la Lama, J.; Fernandez, J.; Punzano, J.A.A.; Nicolas, M.; Nin, S.; Mengual, R.; Ramirez, J.A.A.; Raya, A.-L.L.; Ramos, G. Using Six Sigma tools to improve internal processes in a hospital center through three pilot projects. *Int. J. Healthc. Manag.* **2013**, *6*, 158–167, doi:10.1179/2047971913Y.0000000044.
  5. Beck, M.J.; Okerblom, D.; Kumar, A.; Bandyopadhyay, S.; Scalzi, L. V. Lean intervention improves patient discharge times, improves emergency department throughput and reduces congestion. *Hosp. Pract.* **2016**, *44*, 252–259, doi:10.1080/21548331.2016.1254559.
  6. Castaldi, M.; Sugano, D.; Kreps, K.; Cassidy, A.; Kaban, J. Lean philosophy and the public hospital. *Perioper. Care Oper. Room Manag.* **2016**, *3*, 25–28, doi:10.1016/j.pcorm.2016.05.006.
  7. Trzeciak, S.; Mercincavage, M.; Angelini, C.; Cogliano, W.; Damuth, E.; Roberts, B.W.; Zanoliti, S.; Mazzarelli, A.J. Lean Six Sigma to Reduce Intensive Care Unit Length of Stay and Costs in Prolonged Mechanical Ventilation. *J. Healthc. Qual.* **2018**, *40*, 36–43, doi:10.1097/JHQ.0000000000000075.
  8. Burkitt, K.H.; Mor, M.K.; Jain, R.; Kruszewski, M.S.; McCray, E.E.; Moreland, M.E.; Muder, R.R.; Obrosky, D.S.; Sevvick, M.A.; Wilson, M.A.; et al. Toyota production system quality improvement initiative improves perioperative antibiotic therapy. *Am. J. Manag. Care* **2009**, *15*, 633–642.
  9. New, S.; Hadi, M.; Pickering, S.; Robertson, E.; Morgan, L.; Griffin, D.; Collins, G.; Rivero-Arias, O.; Catchpole, K.; McCulloch, P. Lean Participative Process Improvement: Outcomes and Obstacles in Trauma Orthopaedics. *PLoS One* **2016**, *11*, e0152360, doi:10.1371/journal.pone.0152360.
  10. Collar, R.M.; Shuman, A.G.; Feiner, S.; McGonegal, A.K.; Heidel, N.; Duck, M.; McLean, S.A.; Billi, J.E.; Healy, D.W.; Bradford, C.R. Lean management in academic surgery. *J. Am. Coll. Surg.* **2012**, *214*, 928–936, doi:10.1016/j.jamcollsurg.2012.03.002.
  11. Artenstein, A.W.; Rathlev, N.K.; Neal, D.; Townsend, V.; Vemula, M.; Goldlust, S.; Schmidt, J.; Visintainer, P.; Albert, M.; Alli, G.; et al. Decreasing Emergency Department Walkout Rate and Boarding Hours by Improving Inpatient Length of Stay. *West. J. Emerg. Med.* **2017**, *18*, 982–992, doi:10.5811/westjem.2017.7.34663.
  12. Hassanain, M.; Zamakhshary, M.; Farhat, G.; Al-Badr, A. Use of Lean methodology to improve operating room efficiency in hospitals across the Kingdom of Saudi Arabia. *Int. J. Health Plann. Manage.* **2016**, *32*, 133–146, doi:10.1002/hpm.2334.
  13. Yousri, T.A.; Khan, Z.; Chakrabarti, D.; Fernandes, R.; Wahab, K. Lean thinking: Can it improve the outcome of fracture neck of femur patients in a district general hospital? *Injury* **2011**, *42*, 1234–1237, doi:10.1016/j.injury.2010.11.024.
  14. Montella, E.; Di Cicco, M.V.; Ferraro, A.; Centobelli, P.; Raiola, E.; Triassi, M.; Improta, G. The application of Lean Six Sigma methodology to reduce the risk of healthcare-associated infections in surgery departments. *J. Eval. Clin. Pract.* **2017**, *23*, 530–539, doi:10.1111/jep.12662.
  15. Cima, R.R.; Brown, M.J.; Hebl, J.R.; Moore, R.; Rogers, J.C.; Kollengode, A.; Amstutz, G.J.; Weisbrod, C.A.; Narr, B.J.; Deschamps, C. Use of Lean and Six

- Sigma Methodology to Improve Operating Room Efficiency in a High-Volume Tertiary-Care Academic Medical Center. *J. Am. Coll. Surg.* **2011**, 213, 83–92, doi:10.1016/j.jamcollsurg.2011.02.009.
16. Singh, S.; Nair, D.; Remya, T.; Shijo, T.M.; Nair, P. Lean six sigma application in reducing nonproductive time in operation theaters. *J. Natl. Accred. Board Hosp. Healthc. Provid.* **2014**, 1, 1, doi:10.4103/2348-6139.132908.
  17. Bender, J.S.; Nicolescu, T.O.; Hollingsworth, S.B.; Murer, K.; Wallace, K.R.; Ertl, W.J. Improving operating room efficiency via an interprofessional approach. *Am. J. Surg.* **2015**, 209, 447–450, doi:10.1016/j.amjsurg.2014.12.007.
  18. Beck, M.J.; Gosik, K. Redesigning an inpatient pediatric service using Lean to improve throughput efficiency. *J. Hosp. Med.* **2015**, 10, 220–227, doi:10.1002/jhm.2300.
  19. Tagge, E.P.; Thirumoorthi, A.S.; Lenart, J.; Garberoglio, C.; Mitchell, K.W. Improving operating room efficiency in academic children's hospital using Lean Six Sigma methodology. *J. Pediatr. Surg.* **2017**, 52, 1040–1044, doi:10.1016/j.jpedsurg.2017.03.035.
  20. Toledo, A.; Carroll, T.; Arnold, E.; Tulu, Z.; Caffey, T.; Kearns, L.; Gerber, D. Reducing liver transplant length of stay: A lean six sigma approach. *Prog. Transplant.* **2013**, 23, 350–364, doi:10.7182/pit2013226.
  21. Fairbanks, C. b. Using six sigma and lean methodologies to improve or throughput. *AORN J.* **2007**, 86, 73–82, doi:10.1016/j.aorn.2007.06.011.
  22. Molla, M.; Warren, D.S.; Stewart, S.L.; Stocking, J.; Johl, H.; Sinigayan, V. A Lean Six Sigma Quality Improvement Project Improves Timeliness of Discharge from the Hospital. *Jt. Comm. J. Qual. Patient Saf.* **2018**, 44, 401–412, doi:10.1016/j.jcjq.2018.02.006.
  23. Niemeijer, G.C.; Trip, A.; Ahaus, K.T.B.; Does, R.J.M.M.; Wendt, K.W. Quality in Trauma Care: Improving the Discharge Procedure of Patients by Means of Lean Six Sigma. *J. Trauma Inj. Infect. Crit. Care* **2010**, 69, 614–619, doi:10.1097/TA.0b013e3181e70f90.
  24. Sayeed, Z.; Anoushiravani, A.; El-Othmani, M.; Barinaga, G.; Sayeed, Y.; Cagle, P.; Saleh, K.J. Implementation of a hip fracture care pathway using lean six sigma methodology in a level I trauma center. *J. Am. Acad. Orthop. Surg.* **2018**, 26, 881–893, doi:10.5435/JAAOS-D-16-00947.
  25. Brunsman, A.C. Using lean methodology to optimize time to antibiotic administration in patients with sepsis. *Am. J. Heal. Pharm.* **2018**, 75, S13–S23, doi:10.2146/ajhp161017.
  26. Johnson, A.E.; Winner, L.; Simmons, T.; Eid, S.M.; Hody, R.; Sampedro, A.; Augustine, S.; Sylvester, C.; Parakh, K. Using Innovative Methodologies From Technology and Manufacturing Companies to Reduce Heart Failure Readmissions. *Am. J. Med. Qual.* **2016**, 31, 272–278, doi:10.1177/1062860614562627.
  27. Sirvent, J.M.; Gil, M.; Alvarez, T.; Martin, S.; Vila, N.; Colomer, M.; March, E.; Loma-Orsorio, P.; Metje, T. Lean techniques to improve flow of critically ill patients in a health region with its epicenter in the intensive care unit of a reference hospital. *Med. Intensiva (English Ed.)* **2016**, 40, 266–272, doi:10.1016/j.medine.2015.08.007.
  28. Vose, C.; Reichard, C.; Pool, S.; Snyder, M.; Burmeister, D. Using LEAN to improve a segment of emergency department flow. *J. Nurs. Adm.* **2014**, 44, 558–

563, doi:10.1097/NNA.0000000000000098.

29. Niemeijer, G.C.; Flikweert, E.; Trip, A.; Does, R.J.M.M.; Ahaus, K.T.B.; Boot, A.F.; Wendt, K.W. The usefulness of lean six sigma to the development of a clinical pathway for hip fractures. *J. Eval. Clin. Pract.* **2013**, *19*, 909–14, doi:10.1111/j.1365-2753.2012.01875.x.
30. Sorensen, L.; Idemoto, L.; Streifel, J.; Williams, B.; Mecklenburg, R.; Blackmore, C. A multifaceted intervention to improve the quality of care for patients undergoing total joint arthroplasty. *BMJ Open Qual.* **2019**, *8*, e000664, doi:10.1136/bmjoq-2019-000664.
31. Moo-Young, J.A.; Sylvester, F.A.; Dancel, R.D.; Galin, S.; Troxler, H.; Bradford, K.K. Impact of a Quality Improvement Initiative to Optimize the Discharge Process of Pediatric Gastroenterology Patients at an Academic Children's Hospital. *Pediatr. Qual. Saf.* **2019**, *4*, e213, doi:10.1097/pq9.0000000000000213.
32. Cerfolio, R.J.; Ferrari-Light, D.; Ren-Fielding, C.; Fielding, G.; Perry, N.; Rabinovich, A.; Saraceni, M.; Fitzpatrick, M.; Jain, S.; Pachter, H.L. Improving Operating Room Turnover Time in a New York City Academic Hospital via Lean. *Ann. Thorac. Surg.* **2019**, *107*, 1011–1016, doi:10.1016/j.athoracsur.2018.11.071.
33. Ankrum, A.L.; Neogi, S.; Morckel, M.A.; Wilhite, A.W.; Li, Z.; Schaffzin, J.K. Reduced isolation room turnover time using Lean methodology. *Infect. Control Hosp. Epidemiol.* **2019**, *40*, 1151–1156, doi:10.1017/ice.2019.199.
34. Peter, A.; Parvathaneni, A.; Wilson, C.; Tankalavage, T.; Cheriya, P. Wheels on Time: A Six Sigma Approach to Reduce Delay in Operating Room Starting Time. *Surg. Curr. Res.* **2011**, *01*, 1–4, doi:10.4172/2161-1076.1000102.
35. Allen, T.T.; Tseng, S.-H.H.; Swanson, K.; McClay, M.A. Improving the Hospital Discharge Process with Six Sigma Methods. *Qual. Eng.* **2009**, *22*, 13–20, doi:10.1080/08982110903344812.
36. El-Eid, G.R.; Kaddoum, R.; Tamim, H.; Hitti, E.A. Improving hospital discharge time. *Med. (United States)* **2015**, *94*, e633, doi:10.1097/MD.0000000000000633.
37. Vijay, S.A. Reducing and optimizing the cycle time of patients discharge process in a hospital using six sigma dmaic approach. *Int. J. Qual. Res.* **2014**, *8*, 169–182.
38. Deldar, R.; Soleimani, T.; Harmon, C.; Stevens, L.H.; Sood, R.; Tholpady, S.S.; Chu, M.W. Improving first case start times using Lean in an academic medical center. *Am. J. Surg.* **2017**, *213*, 991–995, doi:10.1016/j.amjsurg.2016.08.025.
39. Adams, R.; Warner, P.; Hubbard, B.; Goulding, T. Decreasing Turnaround Time between General Surgery Cases: A Six Sigma Initiative. *J. Nurs. Adm.* **2004**, *34*, 140–148.
